# Supplementary material for: The global spectrum of protein-coding pharmacogenomic diversity
Source: PubMed Central journal article supplement — Pharmacogenomics J. 2016 Oct 25;18(1):187–95. doi: 10.1038/tpj.2016.77 (PMC5817389; doi:10.1038/tpj.2016.77), 2016-10-25
Supplement: tpj201677x1.pdf [file tpj201677x1.pdf]

| <b>Supplementary Table 1</b> Description of the 1000 Genomes Project Phase 3 representing 2504 individuals from 26 different global populations that are assigned to five super-populations |                        |                                    |                         |                              |
|---------------------------------------------------------------------------------------------------------------------------------------------------------------------------------------------|------------------------|------------------------------------|-------------------------|------------------------------|
| <b>Number of individuals</b>                                                                                                                                                                | <b>Population code</b> | <b>Population description</b>      | <b>Super-population</b> | <b>Super-population code</b> |
| 103                                                                                                                                                                                         | CHB                    | Han Chinese in Beijing, China      | East Asian              | EAS                          |
| 104                                                                                                                                                                                         | JPT                    | Japanese in Tokyo, Japan           | East Asian              | EAS                          |
| 105                                                                                                                                                                                         | CHS                    | Southern Han Chinese               | East Asian              | EAS                          |
| 93                                                                                                                                                                                          | CDX                    | Dai in Xishuangbanna, China        | East Asian              | EAS                          |
| 99                                                                                                                                                                                          | KHV                    | Kinh in Ho Chi Minh City, Vietnam  | East Asian              | EAS                          |
| 99                                                                                                                                                                                          | CEU                    | Utah Residents (CEPH)              | European                | EUR                          |
| 107                                                                                                                                                                                         | TSI                    | Toscani in Italia                  | European                | EUR                          |
| 99                                                                                                                                                                                          | FIN                    | Finnish in Finland                 | European                | EUR                          |
| 91                                                                                                                                                                                          | GBR                    | British in England and Scotland    | European                | EUR                          |
| 107                                                                                                                                                                                         | IBS                    | Iberian population in Spain        | European                | EUR                          |
| 108                                                                                                                                                                                         | YRI                    | Yoruba in Ibadan, Nigera           | African                 | AFR                          |
| 99                                                                                                                                                                                          | LWK                    | Luhya in Webuye, Kenya             | African                 | AFR                          |
| 113                                                                                                                                                                                         | GWD                    | Gambians from The Gambia           | African                 | AFR                          |
| 85                                                                                                                                                                                          | MSL                    | Mende in Sierra Leone              | African                 | AFR                          |
| 99                                                                                                                                                                                          | ESN                    | Esan in Nigeria                    | African                 | AFR                          |
| 61                                                                                                                                                                                          | ASW                    | African Americans in SW USA        | African                 | AFR                          |
| 96                                                                                                                                                                                          | ACB                    | African Caribbeans in Barbados     | African                 | AFR                          |
| 64                                                                                                                                                                                          | MXL                    | Mexican Ancestry from Los Angeles  | Admixed American        | AMR                          |
| 104                                                                                                                                                                                         | PUR                    | Puerto Ricans from Puerto Rico     | Admixed American        | AMR                          |
| 94                                                                                                                                                                                          | CLM                    | Colombians from Medellin, Colombia | Admixed American        | AMR                          |
| 85                                                                                                                                                                                          | PEL                    | Peruvians from Lima, Peru          | Admixed American        | AMR                          |
| 103                                                                                                                                                                                         | GIH                    | Gujarati Indian from Texas         | South Asian             | SAS                          |
| 96                                                                                                                                                                                          | PJL                    | Punjabi from Lahore, Pakistan      | South Asian             | SAS                          |
| 86                                                                                                                                                                                          | BEB                    | Bengali from Bangladesh            | South Asian             | SAS                          |
| 102                                                                                                                                                                                         | STU                    | Sri Lankan Tamil from the UK       | South Asian             | SAS                          |
| 102                                                                                                                                                                                         | ITU                    | Indian Telugu from the UK          | South Asian             | SAS                          |

Data generated from: <ftp://ftp-trace.ncbi.nih.gov/1000genomes/ftp/release/20130502/>  
<http://www.1000genomes.org/category/frequently-asked-questions/population>

**Supplementary Table 2:** please see separate supplementary attachment for these data and related key that provides column heading descriptions.

**Supplementary Table 3:** please see separate supplementary attachment for these data and related key that provides column heading descriptions.

**Supplementary Table 4.** Functional annotations of highly differentiated pharmacogenomic variants in the 17 pharmacogenes that contained variants were common in one population (>5%), but rare (0.05%) in the global cohort.

| ID                 | Population | Gene           | Annotation                        | CADD         |
|--------------------|------------|----------------|-----------------------------------|--------------|
| rs35865660         | GWD        | ACE            | Missense                          | 0.14         |
| rs185351296        | PEL        | ACE            | Intron                            | 8.93         |
| <b>rs75067113</b>  | <b>ESN</b> | <b>ACE</b>     | <b>Synonymous</b>                 | <b>16.31</b> |
| rs4979             | LWK        | ACE            | Synonymous                        | 14.05        |
| rs139471271        | LWK        | ACYP2          | Intron                            | 1.05         |
| rs376175333        | GIH        | ALK            | Missense                          | 21.50        |
| rs6003592          | ESN        | BCR            | Intron                            | 6.64         |
| rs4986854          | JPT        | BRCA1          | Missense                          | 0.023        |
| <b>rs113857788</b> | <b>KHV</b> | <b>CFTR</b>    | <b>Missense</b>                   | <b>26.50</b> |
| rs116593005        | LWK        | CRHR1          | Intron                            | 14.21        |
| rs28399501         | FIN        | CYP2B6         | 3'UTR                             | 3.47         |
| <b>rs181297724</b> | <b>FIN</b> | <b>CYP2C19</b> | <b>Missense and splice region</b> | <b>22.90</b> |
| rs11572079         | FIN        | CYP2C8         | Splice region                     | 0.13         |
| <b>rs141759372</b> | <b>ESN</b> | <b>GSTT1</b>   | <b>Missense</b>                   | <b>27.00</b> |
| rs142766358        | LWK        | HAS3           | Missense                          | 14.10        |
| rs17181024         | ESN        | OPRM1          | Intron                            | 6.20         |
| rs200451188        | ESN        | RYR1           | Synonymous                        | 11.70        |
| rs200023171        | GIH        | RYR1           | Splice region                     | 2.45         |
| rs17215493         | GWD        | SCN5A          | Synonymous                        | 2.90         |
| rs140504750        | ASW        | SULT1A1        | Intron                            | 3.97         |
| rs186462665        | FIN        | TXNRD2         | Synonymous                        | 10.98        |

Potentially deleterious variants (CADD scores  $\geq 15$ ) are displayed in bold. Independent signals ( $r^2 < 0.4$ ) with the largest allele frequency differences between the remaining populations for each gene region are reported.

**Supplementary Table 5:** please see separate supplementary attachment for these data and related key that provides column heading descriptions.

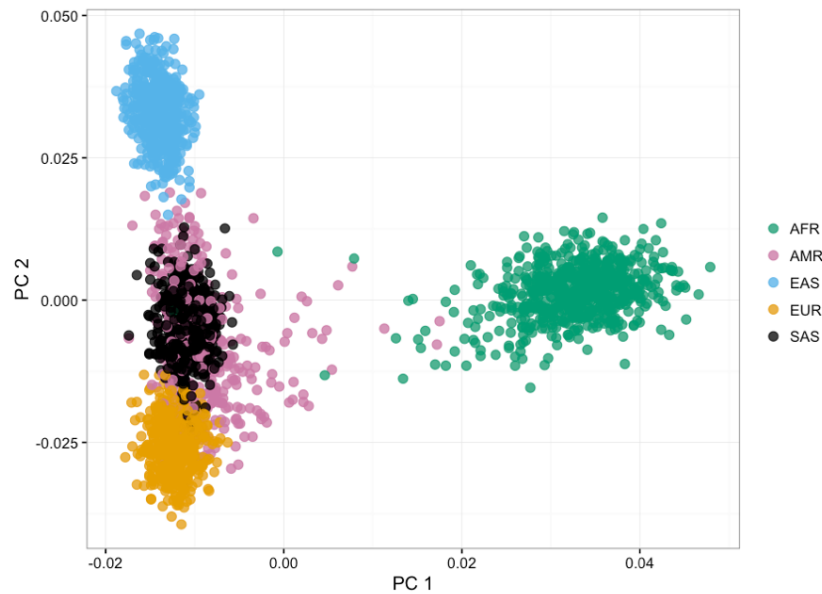

**Supplementary Figure 1** Principal component analysis (PCA) of pharmacogenomic variants stratified individuals into continental super populations, with the admixed American individuals separating along clines between the main ancestral clusters. Principal component 1 separates the African individuals from the rest of the continental populations, while principal component 2 distinguishes European, South and East Asian population groups.

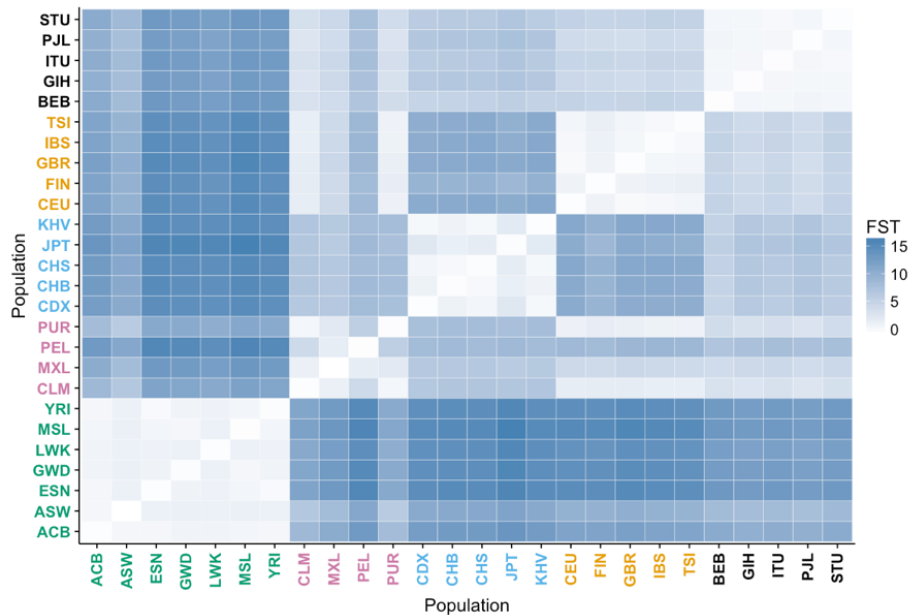

**Supplementary Figure 2** Weir and Cockerham's fixation index ( $F_{ST}$ ) statistics  $\times 100$  for synonymous pharmacogenomic variants in the 1000 Genomes Project individuals. Populations tended to be the most similar on the continental level (indicated by lighter shades of blue) and the admixed American populations showing differing degrees of differentiation from the European populations.

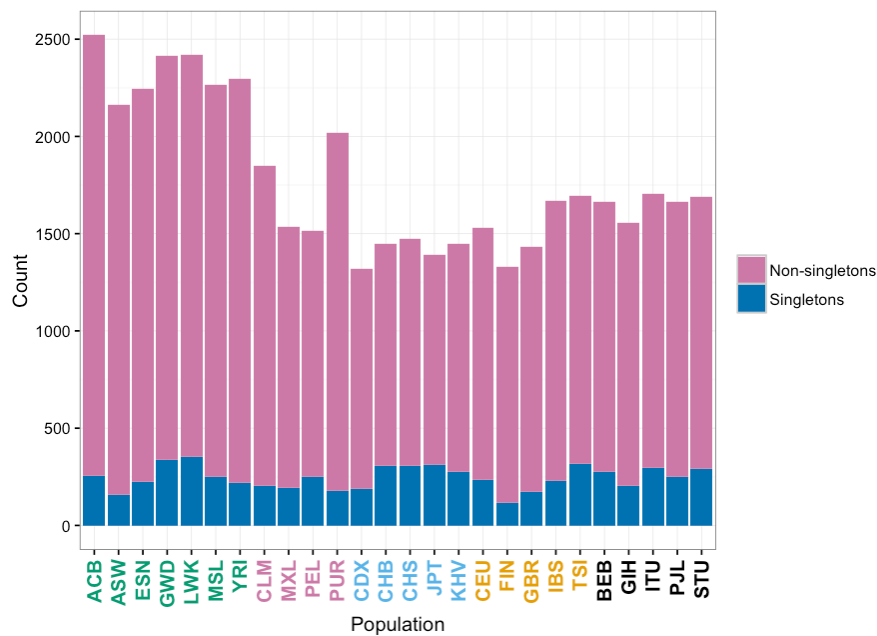

**Supplementary Figure 3** The number of polymorphic sites in each of the individual 1000 Genomes Project individual populations stratified by singleton sites. African populations had the highest number of polymorphic sites in their pharmacogenes.

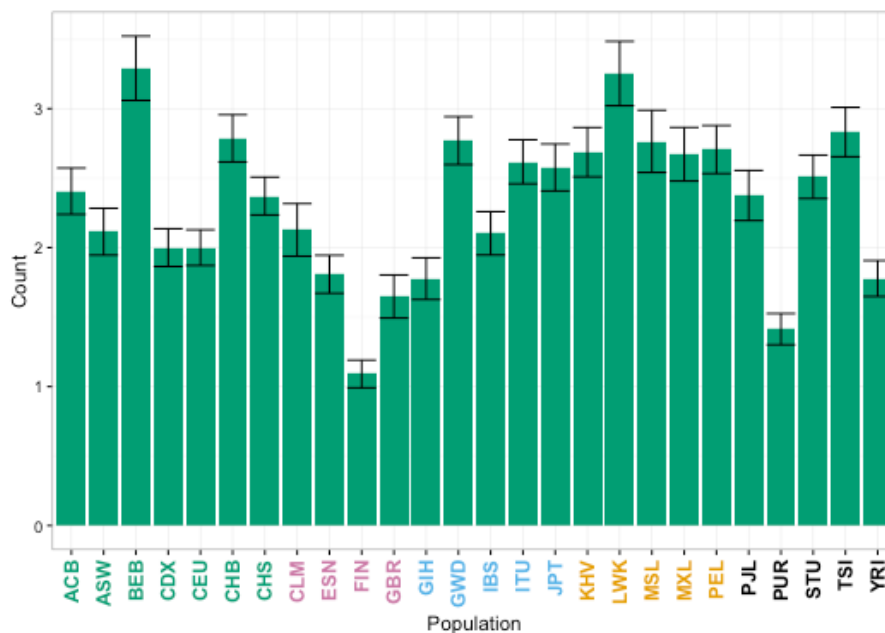

**Supplementary Figure 4** The mean number of pharmacogenomic singletons per individual in each of the 1000 Genomes Populations. Individuals carried between 1 and 3 unique pharmacogenomic variants on average and this class of variation made up 52.9% of the dataset.

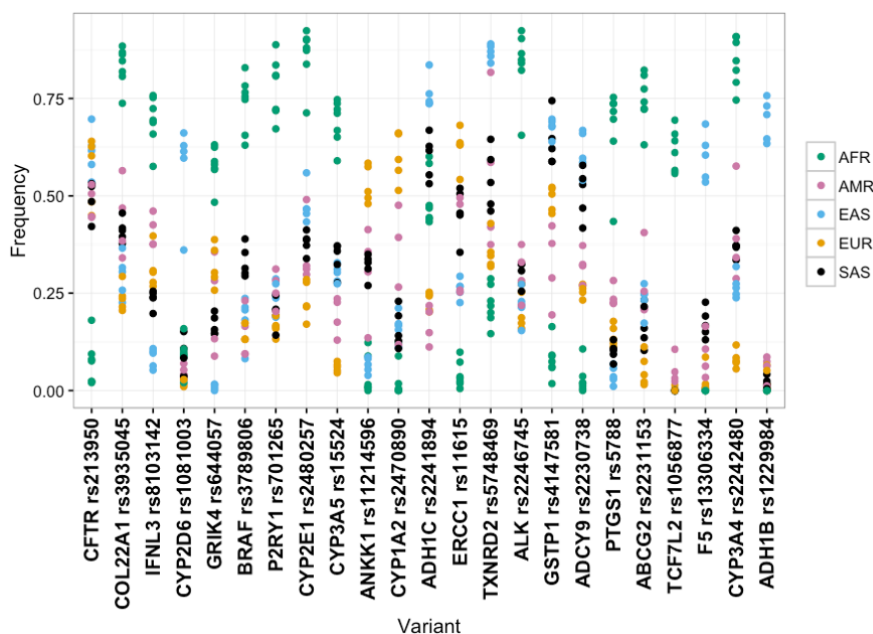

**Supplementary Figure 5** Allele frequencies of pharmacogenomic variants in the 23 pharmacogenes that displayed at least one highly differentiated signal (pairwise  $F_{ST} > 0.5$  for one or more super-population comparison). The highest mean  $F_{ST}$  variant for independent signal ( $r^2 < 0.4$ ) each gene region is reported.

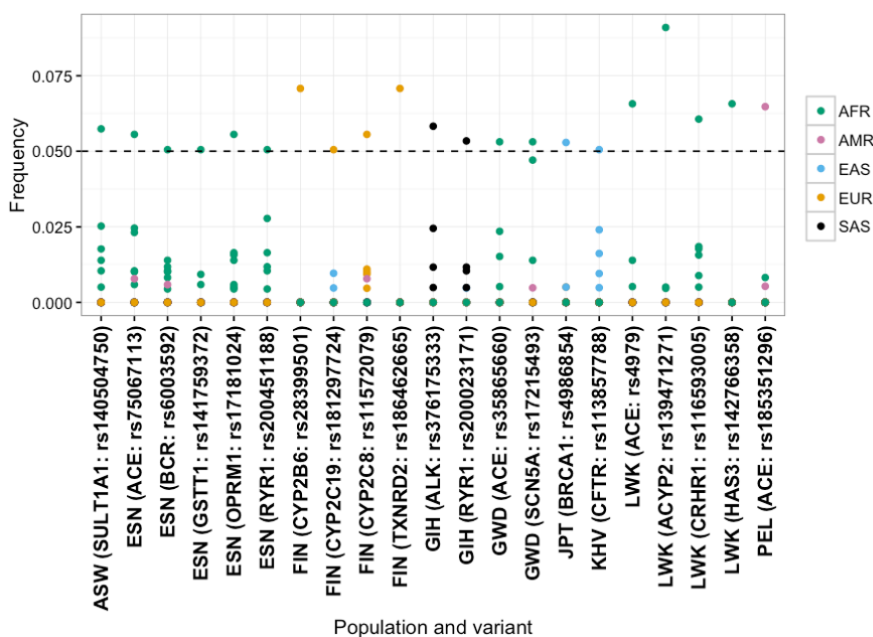

**Supplementary Figure 6** Minor allele frequencies of highly differentiated pharmacogenomic variants in the 17 pharmacogenes that contained variants were common in one population (>5%), but rare (0.05%) in the global cohort. The dashed line represents the 5% minor allele frequency. Independent signals ( $r^2 < 0.4$ ) with the largest allele frequency differences between the remaining populations for each gene region are reported.

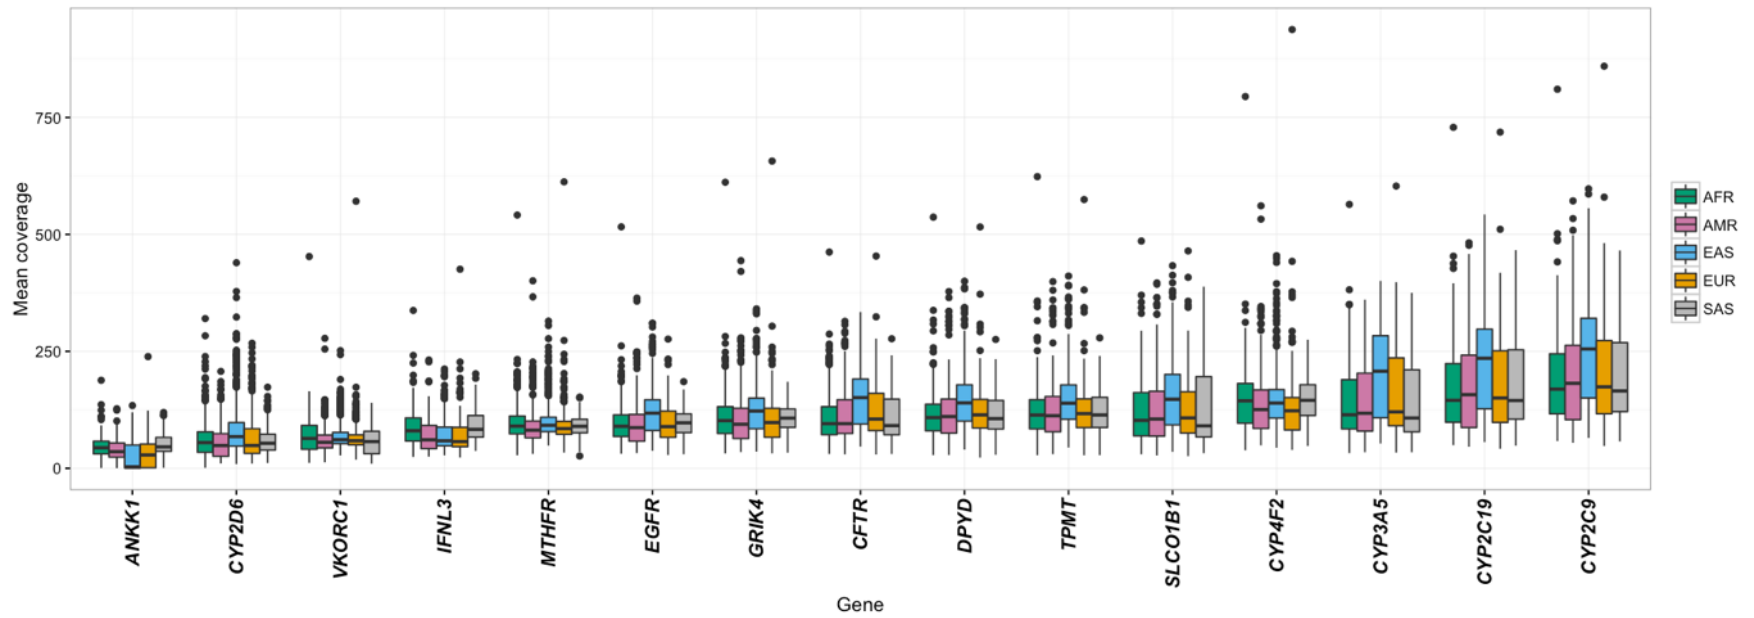

**Supplementary Figure 7** Mean sequencing coverage for each of the 1000 Genomes Project individuals for pharmacogenes that are known to carry high clinical evidence variants (i.e. PharmGKB 1A/B) separated by super-population.

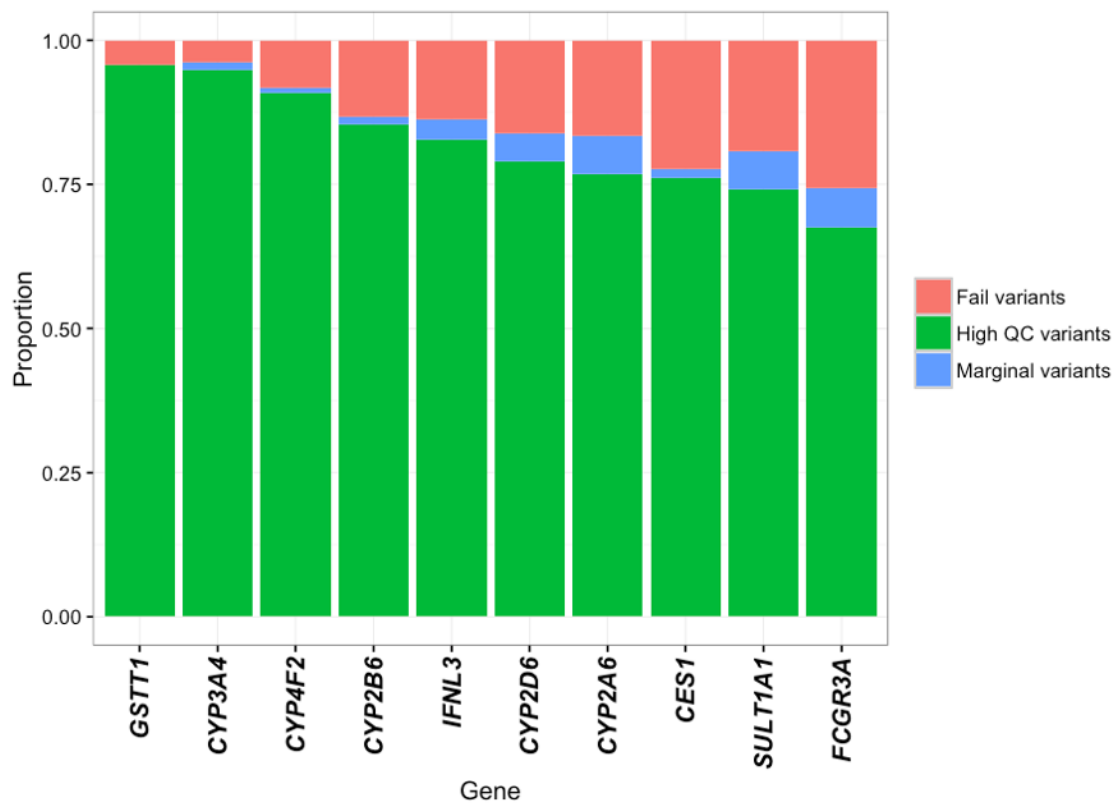

**Supplementary Figure 8** Proportion of different quality variants in the ten pharmacogenes that were flagged as potentially problematic for short read sequencing data. High QC variants had SVM scores  $>0.3$ , while marginal variants had scores between 0 and 0.3. Fail variants were not included in the final release of the 1000 Genomes Project and had SVM scores  $<0$ .

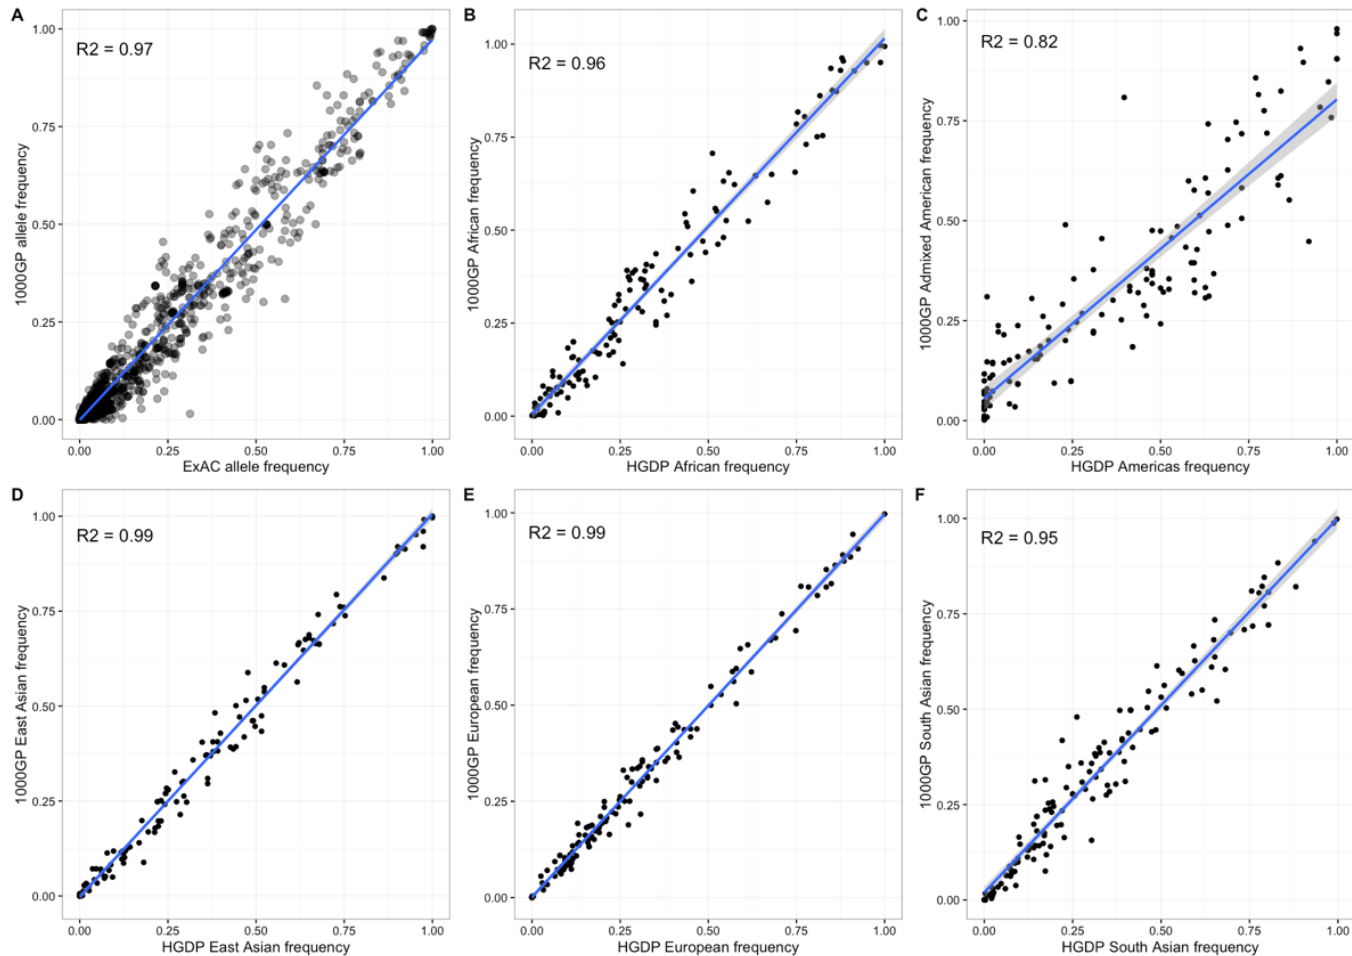

**Supplementary Figure 9** A strong correlation in allele frequencies were observed between overlapping pharmacogenomic variants in the 1000 Genomes Project and those generated by external projects: **A** Comparison between global allele frequency in the 1000 Genomes Project and sequencing data generated through the Exome Aggregation Consortium (10871 variants) **B-F** Comparison between super-population allele frequencies of the 1000 Genomes Project and the Human Genome Diversity Project (136 array-genotyped variants).
